# Supplementary material for: L-Aspartic Acid Capped CdS Quantum Dots as a High Performance Fluorescence Assay for Sliver Ions (I) Detection
Source: MDPI journal article supplement (doi:10.3390/nano9081165), 2019-08-14
Supplement: s1 [file s1]

## Supporting Information

# L-Aspartic Acid Capped CdS Quantum Dots as a High Performance Fluorescence Assay for Silver Ions (I) Detection

Zhezhe Wang<sup>1,2</sup>, Xuechun Xiao<sup>2,\*</sup>, Yue Yang<sup>2</sup>, Tong Zou<sup>1</sup>, Xinxin Xing<sup>2</sup>, Rongjun Zhao<sup>1,2</sup>, Zidong Wang<sup>1</sup> and Yude Wang<sup>1,3,\*</sup>

<sup>1</sup> School of Materials Science and Engineering, Yunnan University, Kunming 650091, China

<sup>2</sup> Department of Physics, Yunnan University, Kunming 650091, China

<sup>3</sup> Key Lab of Quantum Information of Yunnan Province, Yunnan University, Kunming 650091, China

\* Correspondence: xchxiao@ynu.edu.cn (X.X.); ydwang@ynu.edu.cn (Y.W.); Tel: +86-871-65930112 (X.X.) Tel.: +86-871-65035570 (Y.W.); Fax: +86-871-65153832 (Y.W.)

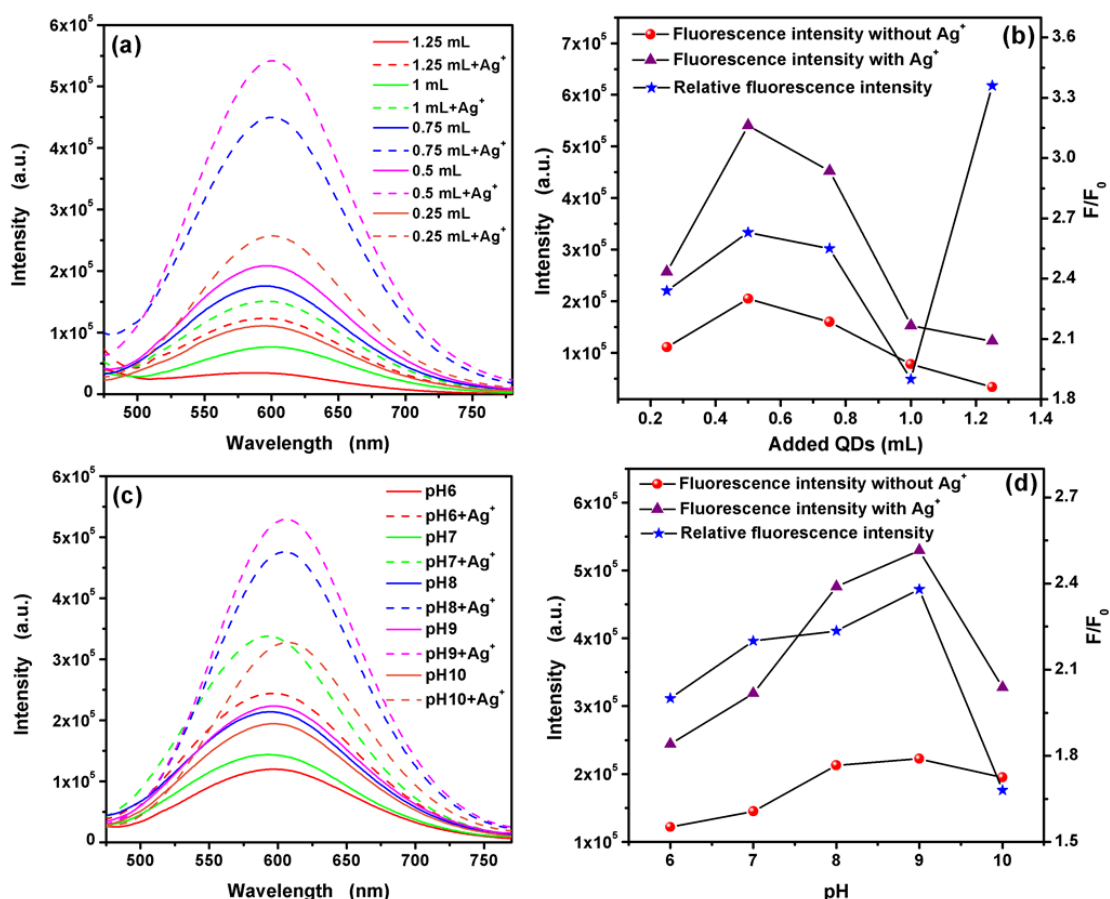

**Figure S1.** (a) Fluorescence spectra at different volumes of L-Asp@CdS QDs in buffer solution at pH 9 and (b) fluorescence intensity without (red) and with (violet) 10  $\mu\text{M}$   $\text{Ag}^+$ , and the relative fluorescence intensity of volume dependence (blue) of L-Asp@CdS QDs, (c) effect of pH on the fluorescence intensity and (d) fluorescence intensity without (red) and with (violet) 10  $\mu\text{M}$   $\text{Ag}^+$ , and relative fluorescence intensity of pH dependence (blue) of L-Asp@CdS QDs.

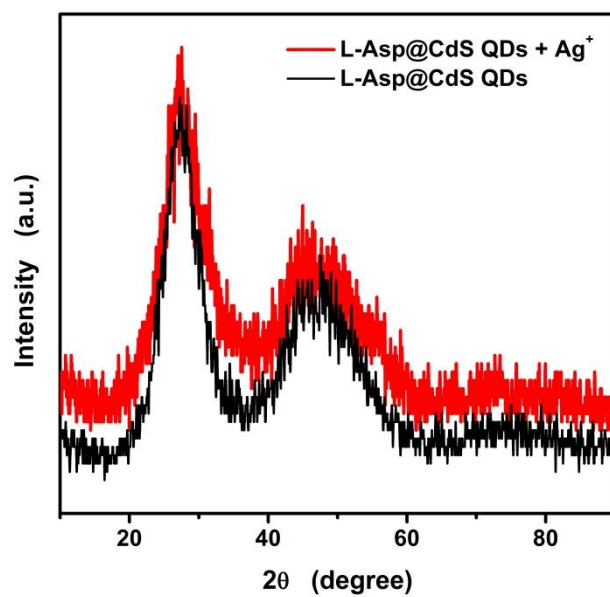

**Figure S2.** XRD patterns of L-Asp@CdS QDs in the absence and presence of  $\text{Ag}^+$  ions.

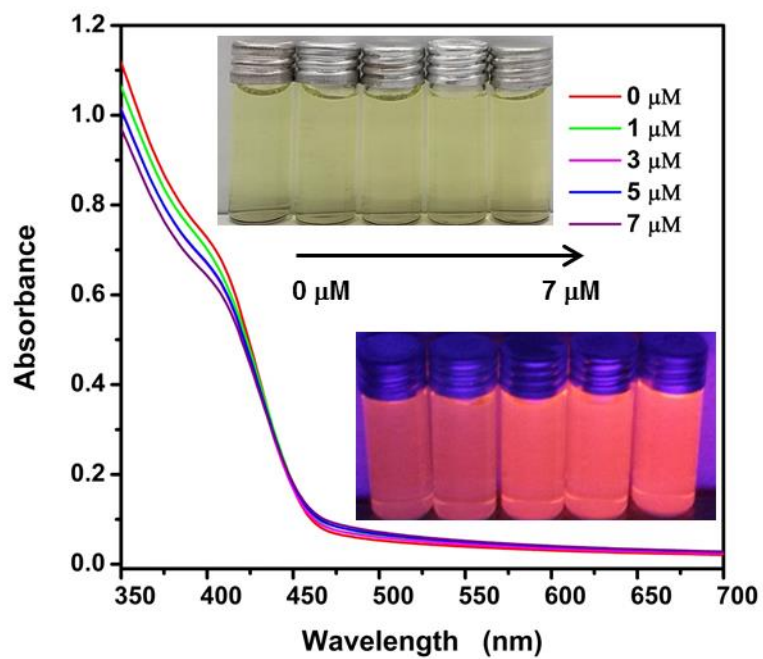

**Figure S3.** UV-vis absorption spectra of L-Asp@CdS QDs in the presence of various concentrations of  $\text{Ag}^+$  ions, inset, the photographs under exposure of white and UV (365 nm) light.

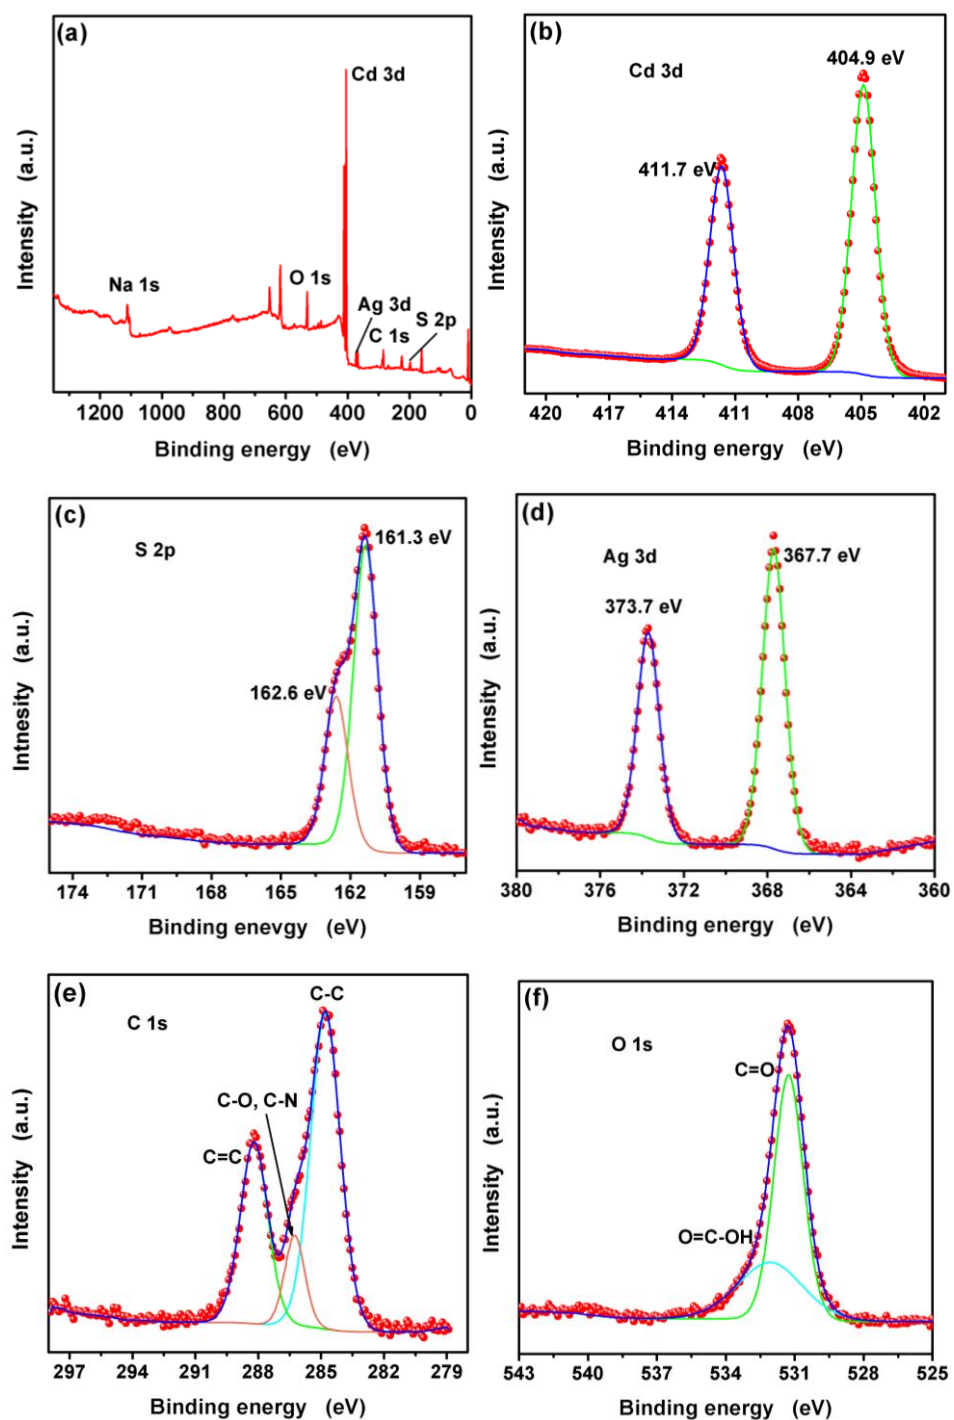

**Figure S4.** XPS spectra of the L-Asp@CdS QDs upon addition of Ag<sup>+</sup> ions: (a) survey, (b) Cd 3d spectrum, (c) S 2p spectrum, (d) Ag 3d, (e) C 1s and (f) O 1s spectrum.

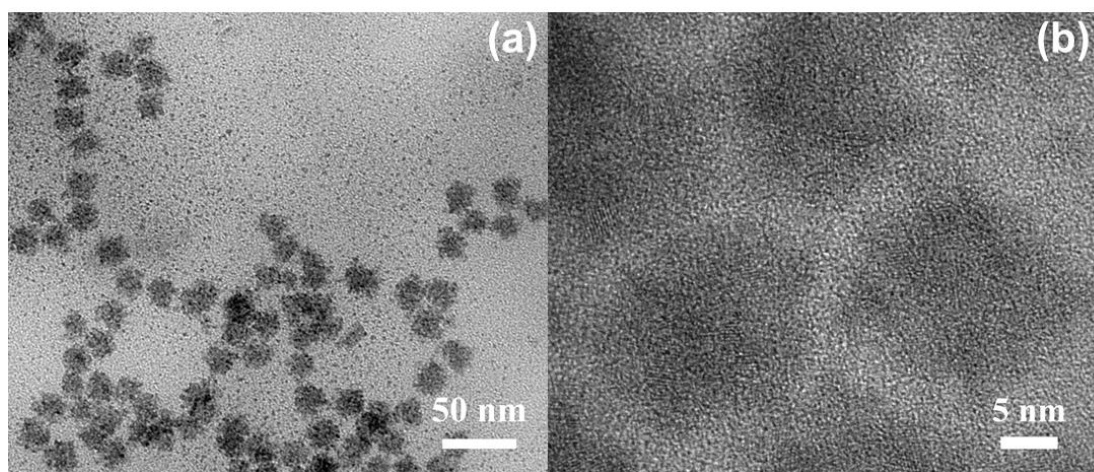

**Figure S5.** The TEM and HRTEM images of L-Asp@CdS QDs upon addition of Ag<sup>+</sup> ions.

**Table S1.** The information of Yunnan Spring.

| Mineral composition (mg/L)      |           | Total dissolved solids (mg/L) | pH      |
|---------------------------------|-----------|-------------------------------|---------|
| H <sub>2</sub> SiO <sub>3</sub> | 20.0–60.0 | 45.0–150.0                    | 6.5–8.5 |
| Ca <sup>2+</sup>                | 3.0–15.0  |                               |         |
| Mg <sup>2+</sup>                | 0.03–5.0  |                               |         |
